# Supplementary material for: A comparison of radiographic leg-length and offset discrepancies between 2 intraoperative measurement techniques in anterior total hip arthroplasty
Source: PubMed Central journal article supplement — Arthroplast Today. 2018 Oct 22;5(2):181–6. doi: 10.1016/j.artd.2018.09.005 (PMC6588659; doi:10.1016/j.artd.2018.09.005), 2018-10-22
Supplement: mmc1.pdf [file mmc1.pdf]

# INDIVIDUAL CONFLICT OF INTEREST STATEMENT

## *American Association of Hip and Knee Surgeons*

(Adopted from the American Academy of Orthopaedic Surgeons disclosure statement)

The following form **must be filled out completely and submitted by each author (example, 6 authors, 6 forms).**  
**All items require a response. If there is no relevant disclosure for a given item, enter "None."**

A Comparison of Radiographic Leg Length and Offset Discrepancies Between Two Intraoperative Measurement Techniques in Anterior Total Hip Arthroplasty

### Manuscript Title

1. Royalties from a company or supplier (The following conflicts were disclosed)  
*None*
2. Speakers bureau/paid presentations for a company or supplier (The following conflicts were disclosed)  
*None*
- 3A. Paid employee for a company or supplier (The following conflicts were disclosed)  
*None*
- 3B. Paid consultant for a company or supplier (The following conflicts were disclosed)  
*None*
- 3C. Unpaid consultants for a company or supplier (The following conflicts were disclosed)  
*None*
4. Stock or stock options in a company or supplier (The following conflicts were disclosed)  
*None*
5. Research support from a company or supplier as a Principal Investigator (The following conflicts were disclosed)  
*None*
6. Other financial or material support from a company or supplier (The following conflicts were disclosed)  
*None*
7. Royalties, financial or material support from publishers (The following conflicts were disclosed)  
*None*
8. Medical/Orthopaedic publications editorial/governing board (The following conflicts were disclosed)  
*None*
9. Board member/committee appointments for a society (The following conflicts were disclosed)  
*None*

**Each author must sign AND print or type his/her name, date and submit a separate form**

In addition, one BLINDED Conflict of Interest form (no author names used) should be submitted per manuscript with all author disclosures.

*Samuel Kuikel*  
Author Name (Print or Type)

*[Signature]*  
Author Signature

*02/02/18*  
Date

# INDIVIDUAL CONFLICT OF INTEREST STATEMENT

## *American Association of Hip and Knee Surgeons*

(Adopted from the American Academy of Orthopaedic Surgeons disclosure statement)

The following form **must be filled out completely and submitted by each author (example, 6 authors, 6 forms).**  
**All items require a response. If there is no relevant disclosure for a given item, enter "None."**

A Comparison of Radiographic Leg Length and Offset Discrepancies Between Two Intraoperative Measurement Techniques  
in Anterior Total Hip Arthroplasty

---

### Manuscript Title

1. Royalties from a company or supplier (The following conflicts were disclosed)
2. Speakers bureau/paid presentations for a company or supplier (The following conflicts were disclosed)
- 3A. Paid employee for a company or supplier (The following conflicts were disclosed)
- 3B. Paid consultant for a company or supplier (The following conflicts were disclosed)
- 3C. Unpaid consultants for a company or supplier (The following conflicts were disclosed)
4. Stock or stock options in a company or supplier (The following conflicts were disclosed)  
*RISATO HEATH*
5. Research support from a company or supplier as a Principal Investigator (The following conflicts were disclosed)  
*DEPUY*
6. Other financial or material support from a company or supplier (The following conflicts were disclosed)
7. Royalties, financial or material support from publishers (The following conflicts were disclosed)
8. Medical/Orthopaedic publications editorial/governing board (The following conflicts were disclosed)
9. Board member/committee appointments for a society (The following conflicts were disclosed)

**Each author must sign AND print or type his/her name, date and submit a separate form**

In addition, one BLINDED Conflict of Interest form (no author names used) should be submitted per manuscript with all author disclosures.

---

*DAVID S. JENSEN* Author Name (Print or Type)      *[Signature]* Author Signature      *2/1/18* Date

# INDIVIDUAL CONFLICT OF INTEREST STATEMENT

## *American Association of Hip and Knee Surgeons*

(Adopted from the American Academy of Orthopaedic Surgeons disclosure statement)

The following form **must be filled out completely and submitted by each author (example, 6 authors, 6 forms).**  
**All items require a response. If there is no relevant disclosure for a given item, enter "None."**

A Comparison of Radiographic Leg Length and Offset Discrepancies Between Two Intraoperative Measurement Techniques  
in Anterior Total Hip Arthroplasty

---

### Manuscript Title

1. Royalties from a company or supplier (The following conflicts were disclosed)  
*None*
2. Speakers bureau/paid presentations for a company or supplier (The following conflicts were disclosed)  
*None*
- 3A. Paid employee for a company or supplier (The following conflicts were disclosed)  
*None*
- 3B. Paid consultant for a company or supplier (The following conflicts were disclosed)  
*None*
- 3C. Unpaid consultants for a company or supplier (The following conflicts were disclosed)  
*None*
4. Stock or stock options in a company or supplier (The following conflicts were disclosed)  
*None*
5. Research support from a company or supplier as a Principal Investigator (The following conflicts were disclosed)  
*None*
6. Other financial or material support from a company or supplier (The following conflicts were disclosed)  
*None*
7. Royalties, financial or material support from publishers (The following conflicts were disclosed)  
*None*
8. Medical/Orthopaedic publications editorial/governing board (The following conflicts were disclosed)  
*None*
9. Board member/committee appointments for a society (The following conflicts were disclosed)  
*None*

**Each author must sign AND print or type his/her name, date and submit a separate form**

In addition, one BLINDED Conflict of Interest form (no author names used) should be submitted per manuscript with all author disclosures.

---

*Daniel C. Austin*                      *[Signature]*                      *2/1/18*  
Author Name (Print or Type)                      Author Signature                      Date

# INDIVIDUAL CONFLICT OF INTEREST STATEMENT

## *American Association of Hip and Knee Surgeons*

(Adopted from the American Academy of Orthopaedic Surgeons disclosure statement)

The following form **must be filled out completely and submitted by each author (example, 6 authors, 6 forms).**  
**All items require a response. If there is no relevant disclosure for a given item, enter "None."**

A Comparison of Radiographic Leg Length and Offset Discrepancies Between Two Intraoperative Measurement Techniques  
in Anterior Total Hip Arthroplasty

---

### Manuscript Title

1. Royalties from a company or supplier (The following conflicts were disclosed)  
*None*
2. Speakers bureau/paid presentations for a company or supplier (The following conflicts were disclosed)  
*None*
- 3A. Paid employee for a company or supplier (The following conflicts were disclosed)  
*None*
- 3B. Paid consultant for a company or supplier (The following conflicts were disclosed)  
*None*
- 3C. Unpaid consultants for a company or supplier (The following conflicts were disclosed)  
*None*
4. Stock or stock options in a company or supplier (The following conflicts were disclosed)  
*None*
5. Research support from a company or supplier as a Principal Investigator (The following conflicts were disclosed)  
*None*
6. Other financial or material support from a company or supplier (The following conflicts were disclosed)  
*None*
7. Royalties, financial or material support from publishers (The following conflicts were disclosed)  
*None*
8. Medical/Orthopaedic publications editorial/governing board (The following conflicts were disclosed)  
*None*
9. Board member/committee appointments for a society (The following conflicts were disclosed)  
*None*

**Each author must sign AND print or type his/her name, date and submit a separate form**

In addition, one BLINDED Conflict of Interest form (no author names used) should be submitted per manuscript with all author disclosures.

---

*Michael Torchia*      *Michael Torchia*      *2/1/18*  
Author Name (Print or Type)      Author Signature      Date
